# Supplementary material
Source: MDPI journal article supplement (https://www.mdpi.com/2073-4344/12/11/1470)
Supplement: s1 [file s1]

# NiFe Layered Double Hydroxide Electrocatalyst Prepared via an Electrochemical Deposition Method for the Oxygen Evolution Reaction

Murugesan Praveen Kumar <sup>1,\*†</sup>, Moorthy Sasikumar <sup>2,†</sup>, Arunachalam Arulraj <sup>1,3</sup>, Venugopalan Rajasudha <sup>4</sup>, Govindhasamy Murugadoss <sup>5,\*</sup>, Manavalan Rajesh Kumar <sup>6</sup>, Shaik Gouse Peera <sup>7,\*</sup> and Ramalinga Viswanathan Mangalaraja <sup>1,\*</sup>

<sup>1</sup> Faculty of Engineering and Sciences, Adolfo Ibáñez University, Diagonal las Torres 2640, Peñalolén, Santiago 7941169, Chile

<sup>2</sup> Department of Physics, Bishop Heber College, Thiruchirapalli 620023, Tamil Nadu, India

<sup>3</sup> Departamento de Física, Facultad de Ciencias Naturales, Universidad de Atacama, Av. Copayapu 485, Copiapó 1531772, Chile

<sup>4</sup> Department of Chemistry, Annai Vailankanni Arts and Science College, Thanjavur 613007, Tamil Nadu, India

<sup>5</sup> Centre for Nanoscience and Nanotechnology, Sathyabama Institute of Science and Technology, Chennai 600119, Tamil Nadu, India

<sup>6</sup> Institute of Natural Science and Mathematics, Ural Federal University, 620002 Yekaterinburg, Russia

<sup>7</sup> Department of Environmental Science, Keimyung University, 1095 Dalgubeol-daero, Dalseo-gu, Daegu 42601, Republic of Korea

\* Correspondence: praveenkumarmurugesan280589@gmail.com (M.P.K.); murugadoss\_g@yahoo.com (G.M.); gouse@kmu.ac.kr (S.G.P.); mangal@uai.cl (R.V.M.)

† These authors contributed to this work equally.

**Table S1.** Comparison with other reports.

| S. No | Electrocatalyst                 | Method                     | Onset potential (V)<br>vs RHE | Medium | Ref.      |
|-------|---------------------------------|----------------------------|-------------------------------|--------|-----------|
| 1.    | NiFe-based<br>(oxy)hydroxide    | Hydrothermal               | 1.53                          | 1M KOH | [1]       |
| 2.    | NiFe-(oxy)hydroxide             | Electrodeposition          | 1.53                          | 5M KOH | [2]       |
| 3.    | NiFoam-NiFe LDH                 | Thin film                  | 1.42                          | 1M KOH | [3]       |
| 4.    | Ni(OH) <sub>2</sub> / NiFe(OOH) | Electrodeposition          | 1.54                          | 1M KOH | [4]       |
| 5.    | NiFe(OOH)                       | Electrospraying ionization | 1.38                          | 1M KOH | [5]       |
| 6.    | NiFe-LDH                        | Electrodeposition          | 1.38                          | 1M KOH | This work |

## References

1. He, Z.; Zhang, J.; Gong, Z.; Lei, H.; Zhou, D.; Zhang, N.; Mai, W.; Zhao, S.; Chen, Y. Activating lattice oxygen in NiFe-based (oxy)hydroxide for water electrolysis. *Nat Commun.* **2022**, *13*, 2191.
2. Pascuzzi, M.E.C.; Man, A.J.W.; Goryachev, A.; Hofmann, J.P.; Hensen, E.J.M. Investigation of the stability of NiFe- (oxy)hydroxide anodes in alkaline water electrolysis under industrially relevant conditions. *Catal. Sci. Technol.* **2020**, *10*, 5593–5601.
3. Li, X.; Liu, C.; Fang, Z.; Xu, L.; Lu, C.; Hou, W. Ultrafast room-temperature synthesis of self-supported NiFe-layered double hydroxide as large-current-density oxygen evolution electrocatalyst. *Small* **2022**, *18*, 2104354.
4. Louie, M.W.; Bell, A.T. An Investigation of thin-film Ni–Fe oxide catalysts for the electrochemical evolution of oxygen. *J. Am. Chem. Soc.* **2013**, *135*, 12329–12337.
5. Dong, J.; Wang, Y.; Jiang, Q.; Nan, Z.-A.; Fan, F. R.; Tian, Z.-Q. Charged droplet-driven fast formation of nickel– iron (oxy)hydroxides with rich oxygen defects for boosting overall water splitting. *J. Mater. Chem. A* **2021**, *9*, 20058–20067.
